# Supplementary material for: Carbon-coated ReS2 hierarchical nanospheres to inhibit polysulfide dissolution in ether-based electrolytes for high-performance Na-ion batteries
Source: Royal Society of Chemistry journal article supplement (doi:10.1039/d3gc02488a), 2023-01-01
Supplement: d3gc02488a1.pdf [file d3gc02488a1.pdf]

## Electronic Supplementary Information

### **Carbon-coated ReS<sub>2</sub> hierarchical nanospheres to inhibit polysulfide dissolution in ether-based electrolytes for high-performance Na-ion batteries**

Jun Xu,\* Xuhui Zhang, Fang Cao, Zilin Mao, Junbao Jiang, Junwei Chen, Yan Zhang\* and Kun Xing\*

School of Microelectronics, and Instrumental Analysis Center, Hefei University of Technology, Hefei 230009, P. R. China

Email: [apjunxu@hfut.edu.cn](mailto:apjunxu@hfut.edu.cn) (J. Xu)

Email: [zhangyan@hfut.edu.cn](mailto:zhangyan@hfut.edu.cn) (Y. Zhang)

Email: [k.xing@hfut.edu.cn](mailto:k.xing@hfut.edu.cn) (K. Xing)

## Experimental section

**Preparation of ReS<sub>2</sub> nanospheres:** The ReS<sub>2</sub> nanospheres were prepared using a hydrothermal method. In a typical procedure, 0.5 mmol of ammonium perrhenate (NH<sub>4</sub>ReO<sub>4</sub>, AR 99.99%) and 2.0 mmol of thioacetamide (TAA, CH<sub>3</sub>CSNH<sub>2</sub>, AR 99%) were dissolved in 35 mL deionized water in a 50 mL Teflon-lined stainless steel autoclave. The autoclave was then sealed and maintained at 180 °C for 24 h. After cooled down to room temperature naturally, the black precipitates were collected by centrifugation, washed with deionized water and ethanol several times, and dried in vacuum at 50 °C.

**Preparation of ReS<sub>2</sub>/C nanospheres:** The as-prepared ReS<sub>2</sub> nanospheres (80 mg) and glucose (C<sub>6</sub>H<sub>12</sub>O<sub>6</sub>·H<sub>2</sub>O) (80 mg) powders were added in absolute ethanol (5 mL). The mixture was ultrasonicated and magnetically stirred. The mixed ReS<sub>2</sub> and glucose were then collected by centrifugation and dried in vacuum at 50 °C. Finally, the ReS<sub>2</sub>/C composite nanospheres were obtained by heating the dried ReS<sub>2</sub> and glucose mixture at 600 °C for 2 h in a chemical vapor deposition furnace at a heating rate of 5 °C/min.

**Materials Characterization:** Morphologies, structures and elemental analysis of the various samples were performed on field emission scanning electron microscope (SEM, ZEISS Gemini 500), transmission electron microscope (TEM, JEOL JEM-2100F, 200 kV) equipped with energy dispersive X-ray spectroscopy (EDS) capability. Crystal phases were characterized by X-ray diffraction (XRD, X-Pert PRO

MPD diffractometer, Cu K $\alpha$  radiation). Carbon content was measured on an elemental analyzer (Elementar vario EL cube). Chemical bonding states were investigated by X-ray photoelectron spectroscopy (XPS, ESCALAB250Xi). Raman spectroscopy was recorded on a confocal micro-Raman system (LabRAM HR Evolution) at 532 nm excitation.

**Coin-cell Fabrication and Electrochemical Measurements:** To prepare the working electrodes, the as-prepared ReS<sub>2</sub>/C (or ReS<sub>2</sub> nanospheres) were mixed with acetylene black (AB) and sodium carboxymethyl cellulose (CMC) with a weight ratio of 6: 2: 2. The mixture with addition of deionized water was then ground into a slurry, which was coated on the copper foil and dried at 80 °C for 12 h in the vacuum oven. The electrode discs with a diameter of 12 mm were punched. The electrochemical performance was investigated by assembling CR2032 coin cells in an argon-filled glove box. The electrolyte was selected by dissolving NaPF<sub>6</sub> in diethylene glycol dimethyl ether (DEGDME) with a concentration of 1.0 mol/L. For comparison, 1.0 mol/L NaClO<sub>4</sub> or NaPF<sub>6</sub> solutions in the ethylene carbonate (EC) and propylene carbonate (PC) (1:1 in volume) were also used as the electrolyte. For half-cell fabrication, sodium metal foil served as the counter electrode, and glass microfiber (Whatman) worked as the separator. The discharge/charge behaviors were measured using the Neware system (5 V 10 mA or 5 V 50 mA). A CHI660E electrochemical workstation was employed to measure the cyclic voltammetry (CV) curves (0.01-3.0 V) and electrochemical impedance spectroscopy in frequency range of 0.1 Hz to 100 kHz.

**Full-cell fabrication and electrochemical measurements:** For full-cell fabrication, the  $\text{ReS}_2/\text{C}$  anode was firstly discharged and charged for 5 cycles in a half-cell at 0.1 A/g during the pre-sodiation process. The commercial  $\text{Na}_3\text{V}_2(\text{PO}_4)_3$  was chosen as the cathode material.  $\text{Na}_3\text{V}_2(\text{PO}_4)_3$ , AB, and polyvinylidene difluoride (PVDF) were mixed at a weight ratio of 7:2:1 to make a slurry and then coated on an Al foil current collector to fabricate the  $\text{Na}_3\text{V}_2(\text{PO}_4)_3$  cathode. The electrode discs with a diameter of 12 mm were punched. The electrolyte of 1.0 mol/L  $\text{NaPF}_6$  in DEGDME was employed. The active material loading of the  $\text{Na}_3\text{V}_2(\text{PO}_4)_3$  cathode was  $0.93 \text{ mg cm}^{-2}$ , and the active material loading of the  $\text{ReS}_2/\text{C}$  anode was  $1.13 \text{ mg cm}^{-2}$ . The weight ratio of  $\text{Na}_3\text{V}_2(\text{PO}_4)_3:\text{ReS}_2/\text{C}$  was approximately 0.82:1. The voltage window was set in the range of 1.0–3.8 V for testing electrochemical performance of the full cells.

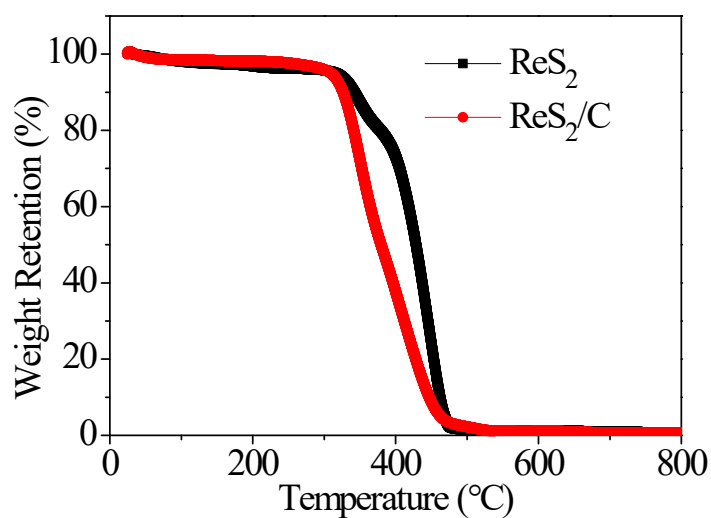

**Fig. S1** TG curves of the ReS<sub>2</sub>/C and ReS<sub>2</sub> samples tested in air atmosphere.

TG analysis was applied to evaluate the C content of ReS<sub>2</sub>/C and ReS<sub>2</sub> samples. The two samples were tested in the temperature ranging from 30 to 800 °C with a heating rate of 10 °C min<sup>-1</sup> in air atmosphere as shown in **Fig. S1**. However, it fails to calculate C content using the TG analysis. Upon heating, ReS<sub>2</sub> can be oxidized to form Re<sub>2</sub>O<sub>7</sub> that has a low boiling point of 360 °C. Therefore, the resulting Re<sub>2</sub>O<sub>7</sub> converted from ReS<sub>2</sub> will be completely evaporated during the heating process.

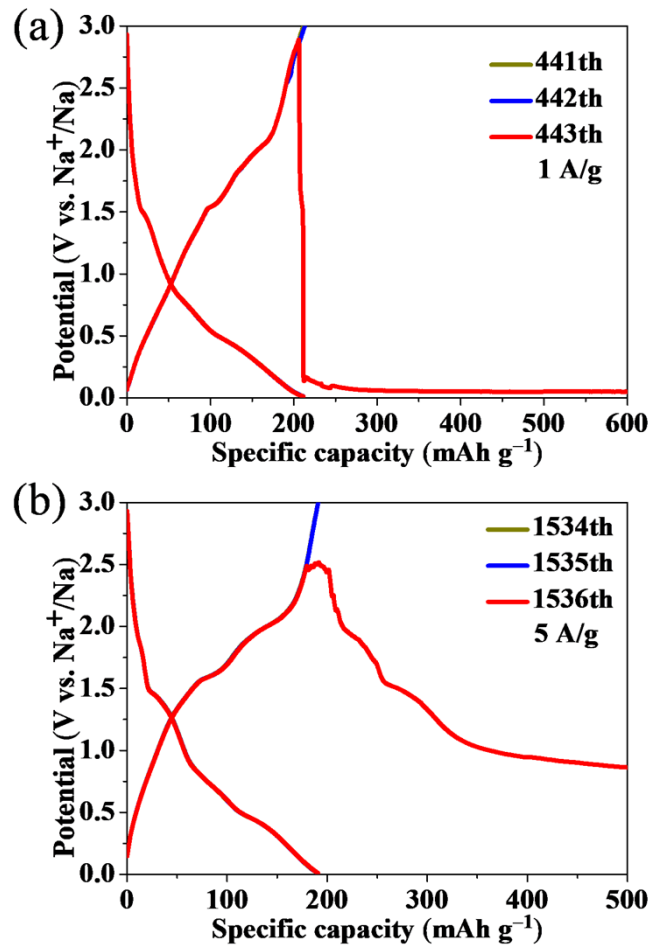

**Fig. S2** The last three discharge/charge curves of the ReS<sub>2</sub> nanospheres for long-term cycling at different current densities.

**Table S1** Recent advances of ReS<sub>2</sub>-based anodes for sodium storage performance.

| Anodes                                | Cycling performance                   | Rate performances                                                                                         | Potential windows | Electrolyte                                     | Ref.      |
|---------------------------------------|---------------------------------------|-----------------------------------------------------------------------------------------------------------|-------------------|-------------------------------------------------|-----------|
| ReS <sub>2</sub> @C                   | 0.2 A/g 400 cycles                    | 388 mAh/g (0.1 A/g)<br>225 mAh/g (2 A/g)                                                                  | 0.01-3 V          | N/A                                             | [1]       |
| ReS <sub>2</sub> /N-CNFs              | 245 mAh/g at 0.1 A/g after 800 cycles | N/A                                                                                                       | 0.01-3 V          | NaSO <sub>3</sub> CF <sub>3</sub><br>in diglyme | [2]       |
| ReS <sub>2</sub> /C<br>Nanocomposite  | ~100 mAh/g at 2 A/g after 600 cycles  | 365 mAh/g (0.1 A/g)<br>145 mAh/g (2 A/g)                                                                  | 0.01-2.5 V        | NaPF <sub>6</sub><br>in EC/DEC                  | [3]       |
| v-ReS <sub>2</sub> /rGO               | 375 mAh/g at 0.1 A/g after 100 cycles | 376 mAh/g (0.2 A/g)<br>255 mAh/g (5 A/g)                                                                  | 0.01-3 V          | NaClO <sub>4</sub><br>in EC/DEC                 | [4]       |
| 1D TiO <sub>2</sub> @ReS <sub>2</sub> | 118 mAh/g at 1A/g after 1000 cycles   | 304 mAh/g (0.1 A/g)<br>195 mAh/g (5 A/g)                                                                  | 0.01-3 V          | NaClO <sub>4</sub><br>in EC/DEC                 | [5]       |
| rGO@ReS <sub>2</sub> @N-C             | 192 mAh/g at 2 A/g after 4000 cycles  | 392 mAh/g (0.2 A/g)<br>231 mAh/g (10 A/g)                                                                 | 0.01-3 V          | NaClO <sub>4</sub><br>in EC/DEC                 | [6]       |
| NiCoS <sub>4</sub> @ReS <sub>2</sub>  | 396 mAh/g at 1 A/g after 500 cycles   | 297 mAh/g (3 A/g)                                                                                         | 0.01-3 V          | NaPF <sub>6</sub><br>in EC/DEC                  | [7]       |
| MXene@ReS <sub>2</sub> @C             | 202 mAh/g at 2 A/g after 200 cycles   | 323 mAh/g (0.1 A/g)<br>233 mAh/g (1 A/g)<br>138 mAh/g (5 A/g)                                             | 0.01-3 V          | NaClO <sub>4</sub><br>in EC/DEC                 | [8]       |
| ReS <sub>2</sub> /C<br>Nanospheres    | 210 mAh/g at 10 A/g after 3000 cycles | 426 mAh/g (0.2 A/g)<br>386 mAh/g (1 A/g)<br>281 mAh/g (5 A/g)<br>241 mAh/g (10 A/g)<br>185 mAh/g (20 A/g) | 0.01-3 V          | NaPF <sub>6</sub><br>in DEGDME                  | This work |

**References:**

- [1] X. Zhang, C. Shen, H. Wu, Y. Han, X. Wu, W. Ding, L. Ni, G. Diao and M. Chen, Filling few-layer ReS<sub>2</sub> in hollow mesoporous carbon spheres for boosted lithium/sodium storage properties. *Energy Storage Mater.*, 2020, **26**, 457-464.
- [2] M. Mao, C. Cui, M. Wu, M. Zhang, T. Gao, X. Fan, J. Chen, T. Wang, J. Ma and C. Wang, Flexible ReS<sub>2</sub> nanosheets/N-doped carbon nanofibers-based paper as a

- universal anode for alkali (Li, Na, K) ion battery. *Nano Energy*, 2018, **45**, 346-352.
- [3] Y. Von Lim, S. Huang, Q. Wu, Y. Zhang, D. Kong, Y. Wang, T. Xu, Y. Shi, Q. Ge, L. K. Ang and H. Y. Yang, Rhenium disulfide nanosheets/carbon composite as novel anodes for high-rate and long lifespan sodium-ion batteries. *Nano Energy*, 2019, **61**, 626-636.
- [4] S. Liu, Y. Liu, W. Lei, X. Zhou, K. Xu, Q. Qiao and W.-H. Zhang, Few-layered ReS<sub>2</sub> nanosheets vertically aligned on reduced graphene oxide for superior lithium and sodium storage. *J. Mater. Chem. A*, 2018, **6**, 20267-20276.
- [5] X. Wang, B. Chen, J. Mao, J. Sha, L. Ma, N. Zhao and F. He, Boosting the stable sodium-ion storage performance by tailoring the 1D TiO<sub>2</sub>@ReS<sub>2</sub> core-shell heterostructures. *Electrochim. Acta.*, 2020, **338**, 135695.
- [6] B. Chen, H. Li, H. Liu, X. Wang, F. Xie, Y. Deng, W. Hu, K. Davey, N. Zhao and S. Z. Qiao, 1T'-ReS<sub>2</sub> Confined in 2D-Honeycombed Carbon Nanosheets as New Anode Materials for High-Performance Sodium-Ion Batteries. *Adv. Energy Mater.*, 2019, **9**, 1901146.
- [7] Z. Li, R. Sun, Z. Qin, X. Liu, C. Wang, S. Lu, Y. Zhang and H. Fan, Coupling of ReS<sub>2</sub> nanosheet arrays with hollow NiCoS<sub>4</sub> nanocubes enables ultrafast Na<sup>+</sup> diffusion kinetics and super Na<sup>+</sup> storage of a NiCoS<sub>4</sub>@ReS<sub>2</sub> heterostructure. *Mater. Chem. Front.*, 2021, **5**, 7540-7547.
- [8] X. Liu, M. Wang, B. Qin, Y. Zhang, Z. Liu and H. Fan, 2D-2D MXene/ReS<sub>2</sub> hybrid from Ti<sub>3</sub>C<sub>2</sub>T<sub>x</sub> MXene conductive layers supporting ultrathin ReS<sub>2</sub> nanosheets for superior sodium storage. *Chem. Eng. J.*, 2022, **431**, 133796.
